# Supplementary material for: Loss of endothelial glucocorticoid receptor promotes angiogenesis via upregulation of Wnt/β-catenin pathway
Source: Springer Nature journal article supplement (doi:10.1007/s10456-021-09773-x), 2021-03-02

**A**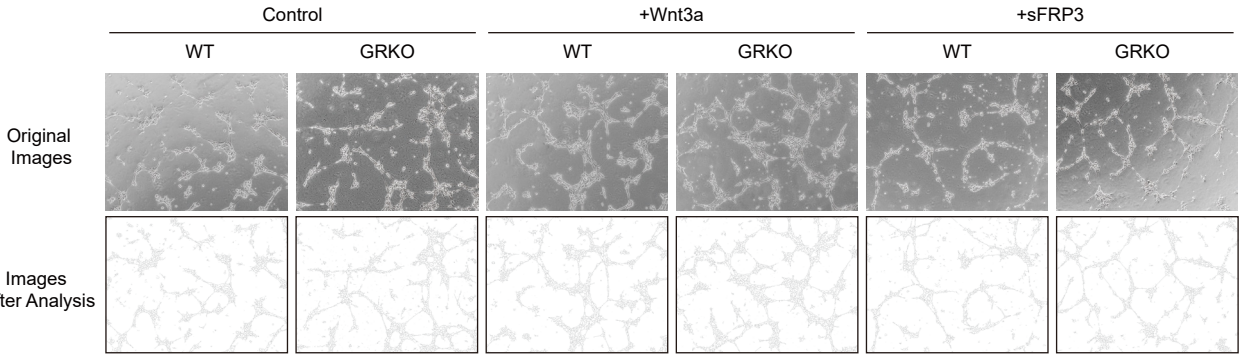**B**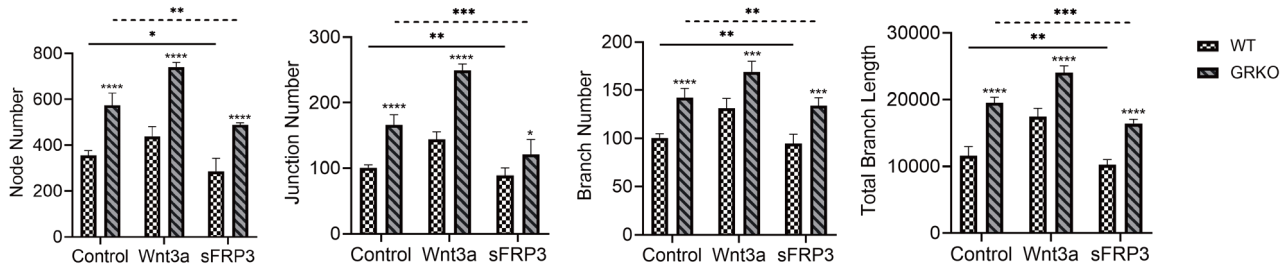**C**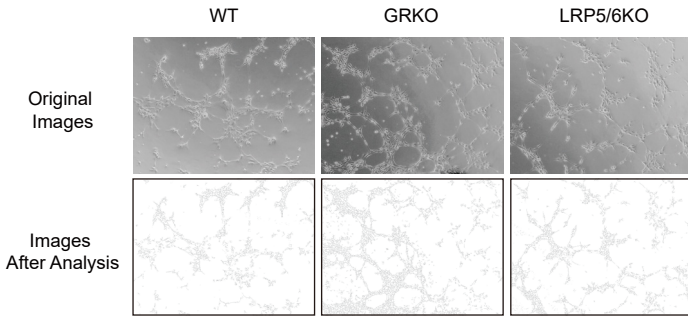**D**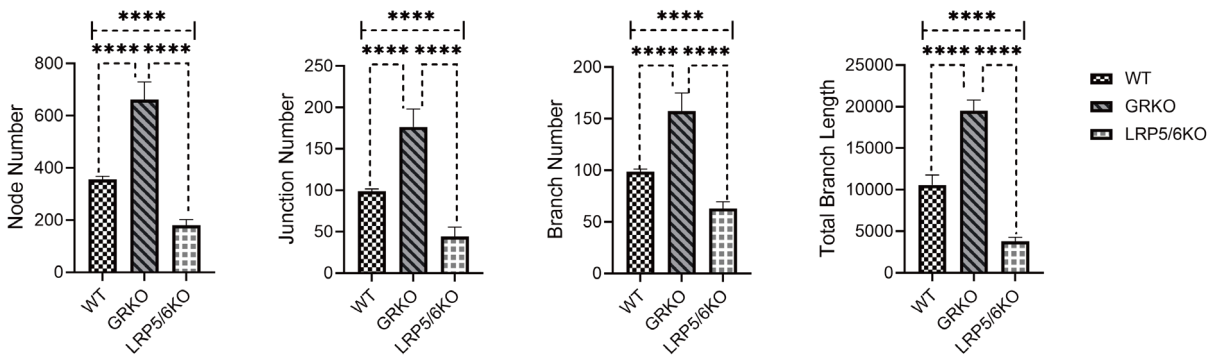

Supplement: MOESM2 [file 18920838]
